# Supplementary material for: A Decision Method for Construction Safety Risk Management Based on Ontology and Improved CBR: Example of a Subway Project
Source: Int J Environ Res Public Health. 2020 Jun 1;17(11):3928. doi: 10.3390/ijerph17113928 (PMC7312838; doi:10.3390/ijerph17113928)
Supplement: Supplementary file 1 [file ijerph-17-03928-s001.pdf]

## Appendix

83 cases on subway construction accidents in China from 2001 to 2019

| NO. | Time       | Project                                             | Accident type                        | Cause                                                                                                                                                                 | Consequence                                                                                                                                                                                   |
|-----|------------|-----------------------------------------------------|--------------------------------------|-----------------------------------------------------------------------------------------------------------------------------------------------------------------------|-----------------------------------------------------------------------------------------------------------------------------------------------------------------------------------------------|
| (1) | 25/05/2001 | Earthwork site at Zhuzilin depot of Shenzhen subway | Collapse                             | The continuous scour of heavy rain caused the soil to loosen                                                                                                          | 1 dead and 1 injured                                                                                                                                                                          |
| (2) | 20/08/2001 | Luban road station of Shanghai subway line 4        | Landslide in the pit                 | Not enough precipitation                                                                                                                                              | 4 people buried and killed                                                                                                                                                                    |
| (3) | 19/04/2002 | Shenzhen subway Guomao station                      | Mechanical injury                    | Traction wire rope broke into two pieces                                                                                                                              | 2 dead and 4 injured                                                                                                                                                                          |
| (4) | 01/07/2003 | Shanghai subway line 4                              | Quicksand                            | Improper command by the construction unit, on-site management personnel illegal construction, flaws in the construction plan, and supervision by the supervision unit | The three buildings were severely tilted, and the flood control wall partially collapsed, causing flooding of the cofferdam and the direct economic loss was estimated to be 150 million yuan |
| (5) | 08/10/2003 | Beijing subway line 5 Chongwenmen station           | Overturn                             | Construction discipline was not strict, workers operate illegally                                                                                                     | 3 dead and 1 minor injury, direct economic loss of 297 thousand yuan                                                                                                                          |
| (6) | 17/03/2004 | Guangzhou subway line 3 Panyu Dashi station         | Landslide in the pit                 | Muddy soil, heavy rainfall led to expansion and loosening of the ground around the shaft causing landslides                                                           | 1 dead and delay of 5 days                                                                                                                                                                    |
| (7) | 01/04/2004 | Guangzhou subway line 3 Liyu station                | Underground continuous wall collapse | Continuous rainfall, water immersed in the concrete brick wall, caused slackening and caused landslides elsewhere                                                     | Subsidence occurred within a certain range of the surrounding area, and nearby residential houses were affected to some extent                                                                |

|      |           |                                                                  |                         |                                                                                                                                                                                    |                                                                                                           |
|------|-----------|------------------------------------------------------------------|-------------------------|------------------------------------------------------------------------------------------------------------------------------------------------------------------------------------|-----------------------------------------------------------------------------------------------------------|
| (8)  | 2004.8.3  | Guangzhou subway line 5                                          | Gas pipe rupture        | Gas leakage caused by mechanical equipment drilling through gas pipelines, and soon reached the explosion limit                                                                    | Tens of thousands of residents were evacuated nearby                                                      |
| (9)  | 2004.9.25 | Pazhou section, Xingang east road, Guangzhou subway line 2       | Foundation pit collapse | Collapse caused by large amount of tap water pouring into foundation pit                                                                                                           | Collapse area of over 400 square meters                                                                   |
| (10) | 2005.1.4  | Dongdan station of Beijing subway line 5                         | Support instability     |                                                                                                                                                                                    | 1 dead and 1 injured                                                                                      |
| (11) | 2005.4.5  | Bottom of Lishuiqiao river of Beijing subway line 5              | near-miss               | Upstream flood discharge                                                                                                                                                           |                                                                                                           |
| (12) | 2005.7.13 | Window of the world station, Shenzhen subway line 2 test section | collapse                | The geological structure was soil and sand, with unstable quicksand, and the construction disrupts the geological structure of the area                                            | Shennan avenue eastbound main road forced to close due to subgrade break                                  |
| (13) | 2005.7.21 | Guangzhou subway Haizhu Square                                   | Foundation pit collapse | The construction and design were inconsistent, the geological conditions were complicated, and there was water seepage and mud seepage in the weak and strong weathered interlayer | Two adjacent buildings tilted to varying degrees, part of the wall cracked, and five workers were injured |
| (14) | 2005.8.1  | Beijing subway line 5 Heping west bridge                         | The crane collapsed     | Problems with crane mechanical hydraulic equipment                                                                                                                                 | 1 passerby dead                                                                                           |
| (15) | 2005.9.24 | Interchange station for Beijing subway line 4 and 10             | Road collapse           | Leakage of pipelines creates cavities and water sacs; construction precipitation and ground disturbance disrupted soil stability                                                   | The gantry crane collapsed, caused a 5m long, 3m wide and 2m deep collapse pit                            |
| (16) | 2005.9.27 | Beijing Xizhimen subway station                                  | Gas leak                | The gas pipe was drilled through by workers                                                                                                                                        | Serious gas leak accident                                                                                 |

|      |            |                                                    |                            |                                                                                                                                                     |                                                                                                                         |
|------|------------|----------------------------------------------------|----------------------------|-----------------------------------------------------------------------------------------------------------------------------------------------------|-------------------------------------------------------------------------------------------------------------------------|
| (17) | 2005.11.3  | Xinzao station of Guangzhou subway line 4          | Mechanical fall            | The cable set on one side of the tunnel wall dropped suddenly                                                                                       | 2 dead and 1 injured seriously                                                                                          |
| (18) | 2005.11.30 | Beijing subway line 10 Olympic Branch line station | Collapse                   | Long-term leakage of sewage pipes forms water sacs, which seriously destabilizes the soil                                                           | One 14m water pipe was suspended, one 60cm water pipe was broken, and a dump truck was buried                           |
| (19) | 2006.1.3   | Hujialou station of Beijing subway line 10         | Working face water gushing | Water pipe rupture, caused large-scale collapse                                                                                                     | Collapse of part of the main paving road                                                                                |
| (20) | 2006.2.27  | Beijing subway line 10                             | Mechanical fall            | The rope of the crane equipment broke and the bucket dropped                                                                                        | 3 dead                                                                                                                  |
| (21) | 2006.4.24  | Guangzhou subway line 5 QuZhuang station           | Explosion                  | Duct explosion                                                                                                                                      | 1 dead and 3 injured seriously                                                                                          |
| (22) | 2006.6.27  | Beijing subway line 10                             | Collapse                   | After seepage, the coating will loosen and eventually cause collapse                                                                                | 1 dead                                                                                                                  |
| (23) | 2006.8.2   | Guangzhou subway line 3                            | Collapse                   | Weak soil around 1 cubic meter                                                                                                                      | 1 dead and 2 injured                                                                                                    |
| (24) | 2006.11.20 | Beijing subway line 4                              | Collapse                   | Sewage pipe leakage caused saturated soil and sand boil, caused the road to collapse                                                                | Subsidence pours into foundation pit                                                                                    |
| (25) | 2007.2.5   | Nanjing subway Line 2                              | Seepage collapse           |                                                                                                                                                     | The road caused a collapse of 60 square meters, and the collapse caused the natural gas pipeline to rupture and explode |
| (26) | 2007.3.28  | Beijing subway line 10 Suzhou street station       | Collapse                   | When local landslides and cracks occur in the construction section, no safety protection measures have been formulated, caused a secondary collapse | 6 dead                                                                                                                  |

|      |            |                                                 |                         |                                                                                                                                                                                               |                                                                                                                                                                                                            |
|------|------------|-------------------------------------------------|-------------------------|-----------------------------------------------------------------------------------------------------------------------------------------------------------------------------------------------|------------------------------------------------------------------------------------------------------------------------------------------------------------------------------------------------------------|
| (27) | 2007.5.28  | Chating station of Nanjing subway line 2        | Landslide in the pit    | Loose soil caused by continuous rainfall                                                                                                                                                      | 2 dead and 1 injured                                                                                                                                                                                       |
| (28) | 2007.9.30  | Shanghai subway line 9                          | Segment fall            | Violation operation                                                                                                                                                                           | 1 dead                                                                                                                                                                                                     |
| (29) | 2007.12.16 | Nanjing subway line 2                           | Road collapse           | There was an unknown hole in the upper part of the tunnel, which was filled with hydrated silt. During the construction, water and silt poured into the tunnel and caused a collapse accident | Create a large pit 10m deep                                                                                                                                                                                |
| (30) | 2008.1.17  | Guangzhou subway line 5                         | Gushing collapse        | Geological situation was more complicated                                                                                                                                                     | 100 square meters of ground collapsed, partial traffic closure of the Pearl River Bridge                                                                                                                   |
| (31) | 2008.4.1   | Shenzhen subway line 3                          | Template collapse       | Violation operation                                                                                                                                                                           | 3 dead and 2 injured                                                                                                                                                                                       |
| (32) | 2008.5     | Guangzhou subway line 6                         | Gas explosion           | On-site safety management flaws                                                                                                                                                               | 3 dead and 6 injured seriously                                                                                                                                                                             |
| (33) | 2008.11.8  | Nanjing subway line 1 south extension           | Support instability     | Stent collapse                                                                                                                                                                                | 7 injured                                                                                                                                                                                                  |
| (34) | 2008.11.15 | Xianghu station of Hangzhou subway line 1       | Foundation pit collapse | Construction unit illegal construction, risky operation, severe over-excavation of foundation pit                                                                                             | It caused a major accident with a length of 100m and a width of 50m in the construction area, causing 21 deaths, 1 serious injury, and 3 light injuries, with a direct economic loss of 49.62 million yuan |
| (35) | 2009.1.8   | Caoyang Road station of Shanghai subway line 11 | Fire                    | On-site safety management flaws                                                                                                                                                               | 1 dead and 3 injured                                                                                                                                                                                       |
| (36) | 2010.7.14  | Shanghai subway line 15                         | Support instability     | Geological situation was more complicated, violation operation                                                                                                                                | 2 dead and 8 injured, direct economic loss of 1.5494 million yuan                                                                                                                                          |

|      |            |                                              |                         |                                                                                                                                                       |                                                                                |
|------|------------|----------------------------------------------|-------------------------|-------------------------------------------------------------------------------------------------------------------------------------------------------|--------------------------------------------------------------------------------|
| (37) | 2010.8.1   | Shenzhen subway Baoan center station No. 1   | Foundation pit collapse | There were thick layers of miscellaneous fill and silt, and continuous rainfall results in saturation of the soil moisture outside the foundation pit | The surrounding area affected by the accident was about 630 square meters      |
| (38) | 2010.11.25 | Xianghu station of Hangzhou subway line 1    | Collapse                | Geological situation was more complicated, violation operation                                                                                        | 1 dead and 1 injured                                                           |
| (39) | 2011.4.2   | Beijing subway line 10                       | Object strike           | The safety awareness of the workers was weak and on-site safety management flaws                                                                      | 1 dead                                                                         |
| (40) | 2011.5.6   | Tianjin subway line 2                        | Road collapse           | Shield captain's illegal operation, geological reasons, insufficient on-site rescue measures                                                          | Local segment deformation and cracking, two shield machines buried underground |
| (41) | 2011.5.8   | Shenzhen subway Daxin subway station         | Biogas poisoning        | The safety awareness of the workers was weak and on-site safety management flaws                                                                      | 2 dead, 1 seriously injured and 3 slightly injured                             |
| (42) | 2011.8.18  | Civil engineering of Shanghai subway line 11 | Collapse                | violation operation, on-site safety management flaws                                                                                                  | 2 dead and 4 seriously injured                                                 |
| (43) | 2011.11.15 | Beijing subway line 10 phase 2               | Object strike           | On-site safety management flaws                                                                                                                       | 1 dead                                                                         |
| (44) | 2012.5.22  | Qilizhuang station of Beijing subway line 9  | Falling                 | The safety awareness of the workers was weak and on-site safety management flaws                                                                      | 1 dead and 1 seriously injured                                                 |
| (45) | 2012.8.7   | Wuhan subway line 2 phase 1                  | Object strike           | violation operation, on-site safety management flaws                                                                                                  | 1 dead                                                                         |
| (46) | 2012.8.23  | Dongcheng district, Beijing subway line 7    | Mechanical injury       | On-site safety management flaws                                                                                                                       | 1 dead                                                                         |
| (47) | 2012.11.9  | Nanchang subway line 1                       | Collapse                | violation operation                                                                                                                                   | 1 dead                                                                         |
| (48) | 2013.5.6   | Xian subway line 3                           | Collapse                | Geological situation was more complicated, violation operation                                                                                        | 5 dead                                                                         |

|      |            |                                                   |                             |                                                                                  |                                                                       |
|------|------------|---------------------------------------------------|-----------------------------|----------------------------------------------------------------------------------|-----------------------------------------------------------------------|
| (49) | 2013.5.6   | Beijing subway line 7                             | Mechanical injury           | On-site safety management flaws                                                  | 1 dead                                                                |
| (50) | 2013.6.13  | Changchun subway line 1                           | Collapse                    | Geological situation was more complicated, violation operation                   | 1 dead                                                                |
| (51) | 2013.9.4   | Wuhan subway line 4                               | Mechanical injury           | violation operation, on-site safety management flaws                             | 1 dead and 2 seriously injured                                        |
| (52) | 2013.9.18  | Wuhan subway line 4 phase 1                       | Electric                    | The safety awareness of the workers was weak and on-site safety management flaws | 2 dead                                                                |
| (53) | 2014.1.18  | Yan'an third road station, Qingdao subway project | Mechanical injury           | violation operation                                                              | 1 dead                                                                |
| (54) | 2014.3.7   | Qingdao subway line 2                             | Object strike               | The safety awareness of the workers was weak and on-site safety management flaws | 1 dead                                                                |
| (55) | 2014.3.23  | Beijing subway Changping line phase 2             | Collapse                    | Geological situation was more complicated                                        | 1 dead                                                                |
| (56) | 2014.8.10  | Zhengzhou subway line 2                           | Object strike               | The safety awareness of the workers was weak                                     | 1 dead                                                                |
| (57) | 2014.8.11  | Guiyang subway line 1                             | Collapse                    | Geological situation was more complicated, violation operation                   | 1 dead                                                                |
| (58) | 2014.10.7  | Nanning subway line 1                             | Foundation pit collapse     | Natural weather influence                                                        | 3 dead, direct economic loss of about 13 million yuan                 |
| (59) | 2014.10.9  | Qingdao subway line 2 phase 1                     | Mechanical injury           | violation operation, defects in construction technology management               | 1 dead                                                                |
| (60) | 2014.12.17 | Nanjing subway line 4                             | Collapse of the steel frame | violation operation, defects in construction technology management               | 4 dead and 3 injured                                                  |
| (61) | 2014.12.24 | Wuhan subway line 3                               | Shield machine flooded      | Burst of water supply pipe                                                       | It took three and a half months from submergence to recovery, with an |

|      |           |                         |                           |                                                                                                                                                                                         |                                                                |
|------|-----------|-------------------------|---------------------------|-----------------------------------------------------------------------------------------------------------------------------------------------------------------------------------------|----------------------------------------------------------------|
|      |           |                         |                           |                                                                                                                                                                                         | economic loss of about 30 million yuan                         |
| (62) | 2015.2.6  | Qingdao subway line 2   | Collapse                  | Geological situation was more complicated, violation operation                                                                                                                          |                                                                |
| (63) | 2015.3.28 | Nanjing subway line 4   | Ground subsidence         | Geological situation was more complicated                                                                                                                                               | Three residential buildings subsidence                         |
| (64) | 2015.5.11 | Shenyang subway line 10 | Collapse                  | Natural weather influence, geological situation was more complicated                                                                                                                    | 1 dead                                                         |
| (65) | 2015.6.25 | Shenzhen subway line 7  | Collapse                  | Geological situation was more complicated                                                                                                                                               | 1 dead and 4 injured                                           |
| (66) | 2015.8.28 | Hangzhou subway line 4  | Gas pipe rupture          | The distribution map of underground pipelines at the construction section was inconsistent with the actual situation                                                                    | Leakage 4300 cubic meters                                      |
| (67) | 2016.1.5  | Wuxi subway line 3      | Collapse                  | It failed to meet the requirements of 1: 1 slope set of construction organization design, and no other supporting measures were taken, resulting in insufficient stability of the slope | 1 dead                                                         |
| (68) | 2016.3.5  | Shenzhen subway line 9  | Collapse                  | The fill layer was mainly composed of cohesive soil, sand, gravel and a small amount of construction waste                                                                              | 1 dead and 1 injured, direct economic loss of 1.9 million yuan |
| (69) | 2016.6.26 | Shenzhen subway line 9  | Falling                   | The safety awareness of the workers was weak and on-site safety management flaws                                                                                                        | 1 dead, direct economic loss of 1.6 million yuan               |
| (70) | 2016.7.8  | Hangzhou subway line 4  | Foundation pit soil surge | Geological situation was more complicated                                                                                                                                               | 4 dead                                                         |
| (71) | 2016.7.29 | Chongqing subway line 5 | Collapse                  | violation operation, defects in construction technology management                                                                                                                      | 3 dead and 1 injured, direct economic                          |

|      |            |                                |                                         |                                                                                                               |                                                                                     |
|------|------------|--------------------------------|-----------------------------------------|---------------------------------------------------------------------------------------------------------------|-------------------------------------------------------------------------------------|
|      |            |                                |                                         |                                                                                                               | loss of 6.68 million yuan                                                           |
| (72) | 2016.10.19 | Shenyang subway line 9         | Collapse                                | Geological situation was more complicated, violation operation                                                | 3 dead                                                                              |
| (73) | 2017.4.19  | Shenzhen subway line 8         | Collapse of the steel frame             | violation operation, defects in construction technology management                                            | 1 dead, 1 seriously injured and 2 slightly injured                                  |
| (74) | 2017.5.11  | Shenzhen subway line 3 phase 3 | Collapse                                | Earthwork excavation was not carried out in accordance with the construction scheme                           | 3 dead and 1 injured, direct economic loss of 3.45 million yuan                     |
| (75) | 2018.1.26  | Guangzhou subway line 21       | Tunnel collapse                         | Geological situation was more complicated, violation operation                                                | 3 dead                                                                              |
| (76) | 2018.1.29  | Chengdu subway line 5          | Poisoning and suffocation               | violation operation                                                                                           | 2 dead and 1 missed                                                                 |
| (77) | 2018.2.7   | Foshan subway line 2           | Foundation pit collapse                 | There was a deep water-rich silt layer near the medium-coarse sand layer with strong water permeability       | 11 dead, 1 missed and 8 injured, direct economic loss was about 53.238 million yuan |
| (78) | 2018.8.8   | Guiyang subway line 2 phase 1  | Collapse of secondary lining steel bars | Geological situation was more complicated                                                                     | 3 dead                                                                              |
| (79) | 2019.5.9   | Shenzhen subway line 8 phase 1 | Mechanical injury                       | violation operation                                                                                           | 1 dead                                                                              |
| (80) | 2019.5.13  | Shenzhen subway line 8 phase 1 | Object strike                           | The safety awareness of the workers was weak and on-site safety management flaws                              | 1 dead                                                                              |
| (81) | 2019.5.27  | Qingdao subway line 4          | Collapse                                | There were a lot of loose and weak strata such as backfill soft soil, sand soil and silt in the filling layer | 5 dead                                                                              |

---

|      |            |                                    |                   |                                           |        |
|------|------------|------------------------------------|-------------------|-------------------------------------------|--------|
| (82) | 2019.5.28  | Changzhou subway line 2<br>phase 1 | Collapse          | Geological situation was more complicated | 1 dead |
| (83) | 2019.06.23 | Tianjin subway line B1 phase 1     | Mechanical injury | violation operation                       | 1 dead |

---
